# Supplementary material for: Plastic recognition and electrogenic uniport translocation of 1st-, 2nd-, and 3rd-row transition and post-transition metals by primary-active transmembrane P1B-2-type ATPase pumps
Source: PubMed Central journal article supplement — Chem Sci. 2023 May 11;14(22):6059–78. doi: 10.1039/d3sc00347g (PMC10246665; doi:10.1039/d3sc00347g), 2023-05-11
Supplement: SC-014-D3SC00347G-s001.pdf [file SC-014-D3SC00347G-s001.pdf]

*Supplementary Information*

**Plastic recognition and electrogenic uniport translocation of 1<sup>st</sup>-, 2<sup>nd</sup>- and 3<sup>rd</sup>-row transition and post-transition metals by transmembrane P<sub>1B-2</sub>-type ATPase pumps**

Sameera S. Abeyrathna<sup>1#</sup>, Nisansala S. Abeyrathna<sup>1#</sup>, Priyanka Basak<sup>1#</sup>, Gordon W. Irvine<sup>1#</sup>, Limei Zhang<sup>2</sup>, Gabriele Meloni<sup>1</sup>

<sup>1</sup> *Department of Chemistry and Biochemistry, The University of Texas at Dallas, Richardson, TX 75080, USA.*

<sup>2</sup> *Department of Biochemistry and Redox Biology Center and the Nebraska Center for Integrated Biomolecular Communication, University of Nebraska—Lincoln, Lincoln, NE 68588, USA.*

*# Contributed equally.*

*Correspondence to:* [gabriele.meloni@utdallas.edu](mailto:gabriele.meloni@utdallas.edu)

## Supplementary Figures

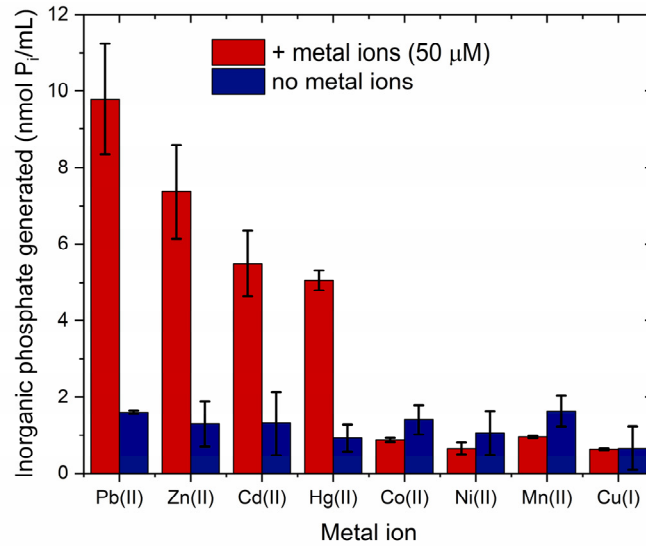

**Figure S1: Background Pi and metal-independent ATPase activity.**

Metal-stimulated *Cm* $\Delta$ ZntA ATPase activity in the presence of different metals in Cymal-7 micelles (metal concentration = 50  $\mu$ M; 30 min, 30  $^{\circ}$ C), compared to the corresponding background Pi generation in the absence of metals. Upon subtracting the Pi originating from buffer and protein independent ATP hydrolysis (approx. 10 nmol Pi/ml) only a minimal metal-independent background ATPase activity by *Cm* $\Delta$ ZntA was observed (in average < 10% compared to the maximal activity, either due to uncoupling or background metal contamination). Thus, the metal-dependent stimulation of *Cm* $\Delta$ ZntA ATPase activity can be reliably quantified (by subtracting the background in the absence of magnesium).

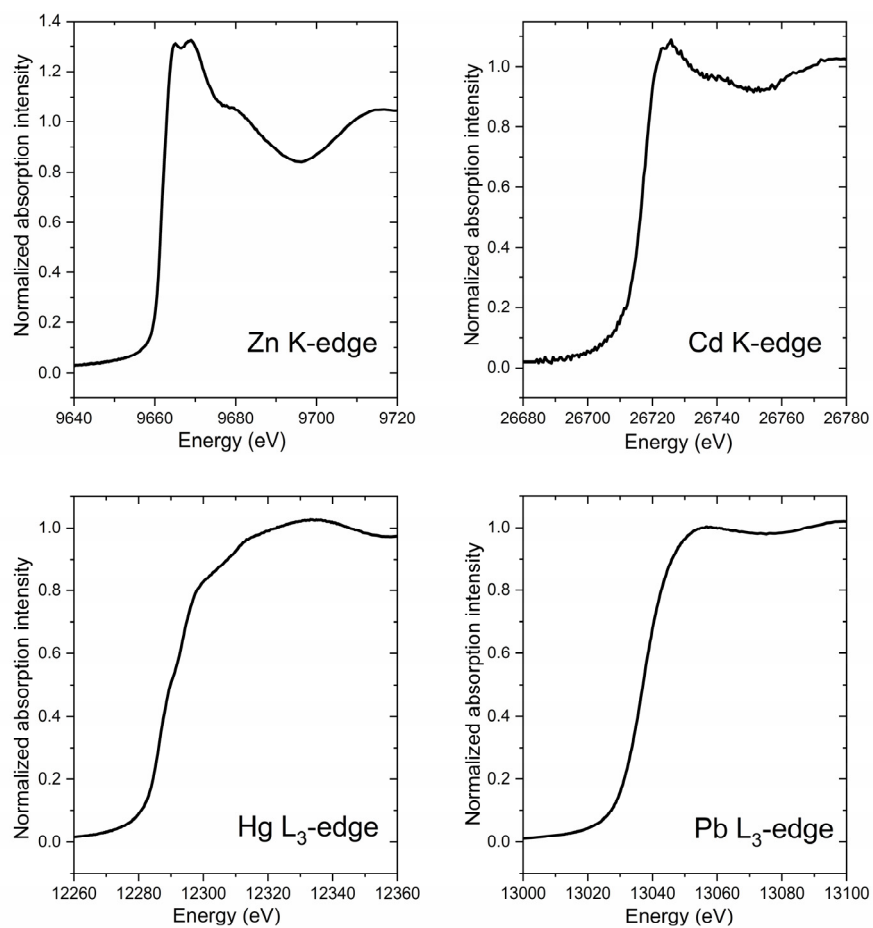

**Figure S2: XANES spectra of *Cm*ΔZntA–M<sup>2+</sup>.**  
 XANES spectra of *Cm*ΔZntA–M<sup>2+</sup> (M<sup>2+</sup>= Zn<sup>2+</sup>, Cd<sup>2+</sup>, Hg<sup>2+</sup> or Pb<sup>2+</sup>) in Cymal-7 detergent micelles.

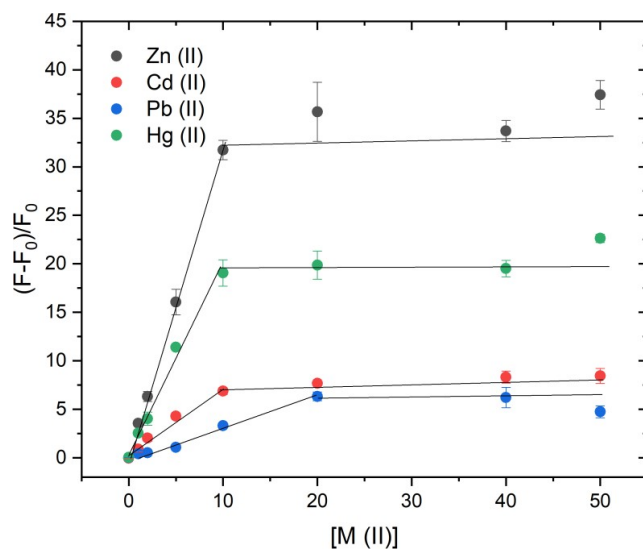

**Figure S3: Titration plot of the metal fluorescent turn-on probes with the corresponding metal ions.**

Fluozin-3 (10  $\mu\text{M}$ ) fluorescence turn-on response upon  $\text{Zn}^{2+}$  (black) or  $\text{Cd}^{2+}$  (red) titration ( $\lambda_{\text{exc}} = 480 \text{ nm}$ ;  $\lambda_{\text{em}} = 515 \text{ nm}$ ); Calcium green (10  $\mu\text{M}$ ) fluorescence response upon  $\text{Hg}^{2+}$  (green) titration ( $\lambda_{\text{exc}} = 506 \text{ nm}$ ;  $\lambda_{\text{em}} = 531 \text{ nm}$ ), and Leadmium green (20  $\mu\text{M}$ ) fluorescence response upon  $\text{Pb}^{2+}$  (blue) titration ( $\lambda_{\text{exc}} = 490 \text{ nm}$ ;  $\lambda_{\text{em}} = 520 \text{ nm}$ ), reported as  $(F-F_0)/F_0$  (with  $F_0$  the fluorescence in the absence of metals), in the presence of 12.5  $\text{mg ml}^{-1}$  liposomes (200nm). Data are mean  $\pm$  s.d. (n=3).

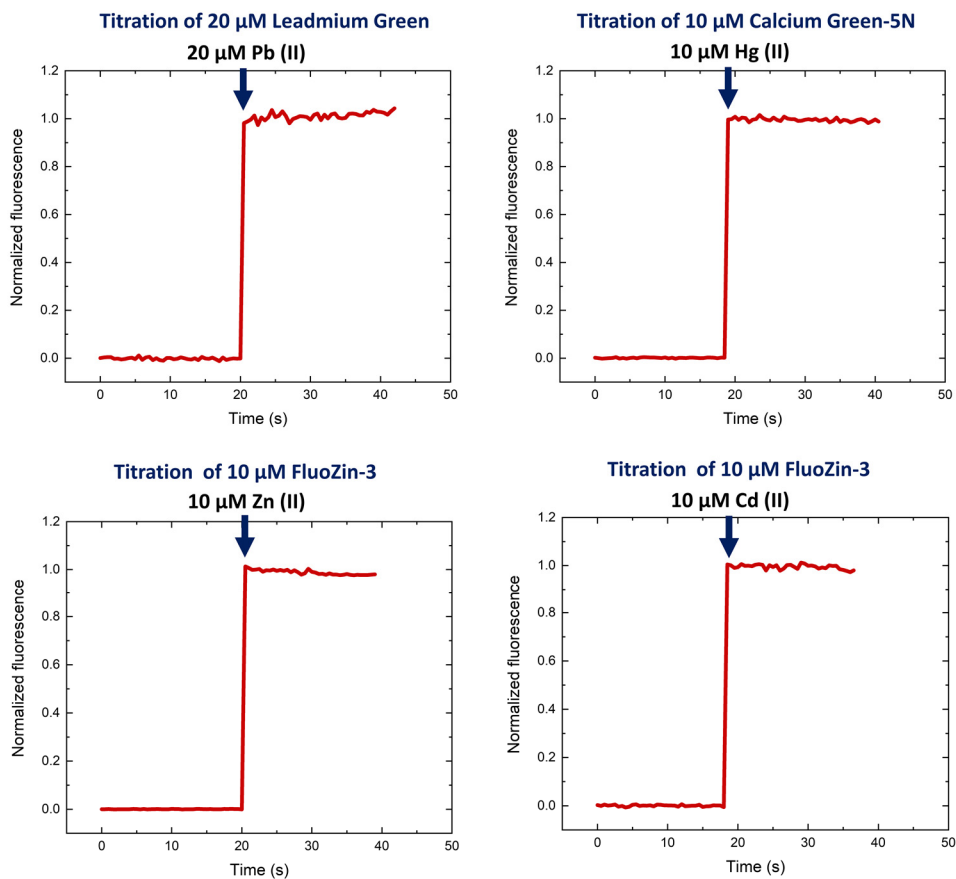

**Figure S4: Kinetics of metal binding to the probes.**

Fluorescence kinetic traces obtained upon titration of the fluorescent turn-on probes with Zn(II), Cd(II), Hg(II), and Pb(II). Complete stoichiometric binding occurs within the manual mixing-time upon metal addition (see arrow; approx. 5 seconds).

**Table S1:** Progression to best EXAFS fits for each metal-site

| Shell                 | r (Å)          | $\sigma^2$ ( $\times 10^{-3}$ Å <sup>-2</sup> )* | R-factor(%) | Red. $\chi^2$ |
|-----------------------|----------------|--------------------------------------------------|-------------|---------------|
| <b><u>Zn-site</u></b> |                |                                                  |             |               |
| 4N/O                  | 2.11(2)        | 7(2)                                             | 27.5        | 184.7         |
| 4S                    | 2.25(2)        | 10(1)                                            | 14.5        | 97.2          |
| 3N/O                  | 2.03(1)        | 4(1)                                             |             |               |
| 1S                    | 2.31(1)        | 1(0)                                             | 4.12        | 35.1          |
| <b>2N/O</b>           | <b>1.99(0)</b> | <b>2(0)</b>                                      |             |               |
| <b>2S</b>             | <b>2.29(0)</b> | <b>4(0)</b>                                      | <b>2.91</b> | <b>24.8</b>   |
| <b><u>Cd-site</u></b> |                |                                                  |             |               |
| 4N/O                  | 2.46(0)        | 15(59)                                           | 98.80       | 327.41        |
| 2S                    | 2.46(0)        | 1(0)                                             | 2.73        | 9.03          |
| 3S                    | 2.46(0)        | 3(0)                                             | 1.48        | 4.93          |
| 4S                    | 2.46(0)        | 5(0)                                             | 4.85        | 16.09         |
| 1N/O                  | 2.24(2)        | <i>negative</i>                                  |             |               |
| 2S                    | 2.53(2)        | 2(0)                                             | 1.21        | 5.01          |
| <b>2N/O</b>           | <b>2.32(2)</b> | <b>5(0)</b>                                      |             |               |
| <b>2S</b>             | <b>2.48(2)</b> | <b>2(2)</b>                                      | <b>1.73</b> | <b>6.4</b>    |
| 3N/O                  | 2.30(1)        | 0(0) <sup>a</sup>                                |             |               |
| 1S                    | 2.57(1)        | 2(2)                                             | 1.21        | 5.0           |
| <b>4N/O</b>           | <b>2.36(1)</b> | <b>1(0)</b>                                      |             |               |
| <b>1S</b>             | <b>2.53(1)</b> | <b>3(1)</b>                                      | <b>1.54</b> | <b>6.4</b>    |

---

|                       |                |                         |             |            |
|-----------------------|----------------|-------------------------|-------------|------------|
| 3N/O                  | 2.30(2)        | 25(11)                  |             |            |
| 2S                    | 2.54(1)        | 1(1)                    | 2.08        | 8.6        |
| 5N/O                  | 2.37(0)        | 3(1)                    |             |            |
| 1S                    | 2.51(1)        | 3(1)                    | 2.39        | 9.8        |
| 4N/O                  | 2.22(3)        | 29(11)                  |             |            |
| 2S                    | 2.46(2)        | 1(0)                    | 2.07        | 8.6        |
| <b><u>Hg-site</u></b> |                |                         |             |            |
| 4N/O                  | 2.43(0)        | neg                     | 4.64        | 18.7       |
| 5N/O                  | 2.43(0)        | 0(0)                    | 3.43        | 13.9       |
| 6N/O                  | 2.43(0)        | 1(0)                    | 3.93        | 15.9       |
| 2S                    | 2.33(1)        | 3(0)                    | 2.21        | 8.5        |
| 3S                    | 2.33(1)        | 5(0)                    | 8.7         | 33.3       |
| 1N/O                  | 2.44(1)        | 0(2) <sup>a</sup>       |             |            |
| 2S                    | 2.33(1)        | 4(0)                    | 1.53        | 7.5        |
| <b>1N/O</b>           | <b>2.48(3)</b> | <b>5(0)<sup>b</sup></b> |             |            |
| <b>2S</b>             | <b>2.33(0)</b> | <b>3(0)</b>             | <b>1.66</b> | <b>7.1</b> |
| 2N/O                  | 2.49(1)        | 0(2) <sup>a</sup>       |             |            |
| 2S                    | 2.31(1)        | 5(1)                    | 3.10        | 15.1       |
| 2N/O                  | 2.49(1)        | 5(0) <sup>b</sup>       |             |            |
| 2S                    | 2.31(1)        | 3(0)                    | 3.31        | 15.1       |
| <b><u>Pb-site</u></b> |                |                         |             |            |
| 2N/O                  | 2.54(1)        | 1(1)                    | 18.76       | 37.1       |

---

---

|             |                |             |             |             |
|-------------|----------------|-------------|-------------|-------------|
| 2S          | 2.67(2)        | 9(1)        | 8.06        | 15.9        |
| 3S          | 2.65(2)        | 9(0)        | 10.94       | 17.63       |
| 2N/O        | 2.48(6)        | 10(4)       |             |             |
| 1S          | 2.67(1)        | 3(1)        | 8.50        | 20.5        |
| <b>1N/O</b> | <b>2.52(2)</b> | <b>1(2)</b> |             |             |
| <b>2S</b>   | <b>2.67(2)</b> | <b>9(1)</b> | <b>7.34</b> | <b>17.7</b> |
| 2N/O        | 2.54(2)        | 4(3)        |             |             |
| 2S          | 2.65(2)        | 10(4)       | 7.92        | 19.1        |

---

r - inter atomic distance (in parentheses are mean-square deviations)

$\sigma^2$  - Debye-Waller factor (in parentheses are mean-square deviations in DW factor).

\* - values reported as 0 represent small positive numbers after 3 significant figures (e.g. 0.003 with 0.002 error = 3(2); 0.0004 with 0.0001 error = 0(0))

<sup>a</sup> Unacceptable negative or null value

<sup>b</sup>  $\sigma^2$  was fixed during fitting.



**Table S2:** Relative *CmΔZntA* ATPase activity and translocation “efficiency” observed for metal-stimulated ATPase hydrolysis ( $V_{\max}/K_M, M^{2+}$ ) and metal translocation ( $[\delta F/\delta t]/K_M$ ) in proteoliposomes, indicating the preferential order for metal substrates ( $Pb(II) > Zn(II) > Hg(II) \sim Cd(II)$ ).

|               | $V_{\max}/K_M, M^{2+}$ | $[\delta F/\delta t]/K_M$ |
|---------------|------------------------|---------------------------|
| <b>Pb(II)</b> | 0.34                   | 1.35                      |
| <b>Zn(II)</b> | 0.15                   | 0.29                      |
| <b>Cd(II)</b> | 0.13                   | 0.17                      |
| <b>Hg(II)</b> | 0.12                   | 0.14                      |
